# Supplementary material
Source: Elsevier journal article supplement (https://www.sciencedirect.com/science/article/pii/S0213911114000922)
Supplement: mmc1 [file S0213911114000922:mmc1.doc]

**Anexo. Tablas con todos los indicadores propuestos y enlaces *web.***

**Tabla 1** Indicadores del contexto socioeconómico y político: definición, características y fuentes de información.

| **Determinante** | **Indicador y definición** | **Nivel de agregación** | **Serie de datos (años)** | **Fuente de datos** |
| --- | --- | --- | --- | --- |
| Gobierno y tradición política | Participación electoral: porcentaje de personas del censo electoral que han votado, incluidos los votos nulos (no los votos en blanco) en las elecciones al Congreso de los Diputados | País, CCAA | 1994-2012 | Ministerio del Interior. Barómetro Social de España. http://barometrosocial.es/participacion |
| Porcentaje de votos a partidos de izquierdas | País, CCAA | 1977-2012 | Junta Electoral Central  <http://www.infoelectoral.mir.es/min/home.html>  Introducir la selección necesaria para obtener el indicador |
| Densidad sindical: razón de trabajadores/as sindicados/as sobre el total de trabajadores | País | 1999-2010 | OECD <http://stats.oecd.org/> (apartado labour – trade union density |
| Número de manifestaciones realizadas anuales | País, CCAA | 2005-2012 | Anuarios Estadísticos del Ministerio del Interior. En el capítulo de Derechos fundamentales” http://www.interior.gob.es/documents/642317/1204854/Anuario_estadistico_2012_okkk.pdf/00ee01c7-3122-496a-a023-22829653e6c0 |
| Índice de transparencia de las CCAA: publicación de información sobre 80 indicadores de las áreas más importantes que los gobiernos de una comunidad autónoma deberían poner públicamente a disposición de la sociedad | CCAA | 2010, 2012 | Transparency International España  http://www.transparencia.org.es/ |
| Índice de percepción de corrupción | País | 2002-2012 | Transparency International España  http://www.transparencia.org.es |
| Mercado laboral | Estructura salarial | País, CCAA, sexo, nacionalidad, sector de actividad, tipo de jornada y tipo de contrato | 2008-2011 | Encuesta anual de estructura salarial. INE. <http://www.ine.es/jaxi/menu.do?type=pcaxis&path=/t22/p133/cno11/serie/&file=pcaxis> |
| Salario mínimo interprofesional: variación en porcentaje y expresado en euros/día o euros/ mes | País, edad | 1990-2013 | Condiciones de trabajo y Relaciones laborales. INE. http://www.ine.es/jaxi/tabla.do?path=/t22/a063/a1998/l0/&file=m30026.px&type=pcaxis&L=0 |
|  | Porcentaje de paro en la población activa obtenida como la media de los cuatro trimestres de cada año | País, CCAA, sexo, estudios alcanzados y edad | 1994-2012  Los cambios metodológicos introducidos en 2001 y 2005 reducen el número de personas definidas como desempleadas, el INE lo estima en el 20% y el 4%, respectivamente | Encuesta de población activa. INE. http://www.ine.es/inebaseDYN/epa30308/epa_resultados_2.htm |
| Porcentaje de paro en población de 16-29 años según el nivel educativo | País, CCAA | 1991-2010 | INEbase. Indicadores sociales. INE  <http://www.ine.es/daco/daco42/sociales10/educa-naci.xls>  Tabla 1 |
| Proporción de perceptores de prestaciones contributivas de desempleo (media anual) sobre el total de parados detectados por la Encuesta de población activa (media de los cuatro trimestres) | País | 1994-2012a | Elaborado por el Barómetro social: <http://barometrosocial.es/proteccion-social>.  Fuente original de los datos: Prestaciones por desempleo. <http://www.empleo.gob.es/estadisticas/BEL/PRD/prd1_top_HTML.htm> |
| Número de personas con prestaciones por desempleo | País, CCAA, clase de prestación, sexo, edad | 1994-2012 | Prestaciones por desempleo. INEbase  http://www.ine.es/jaxi/tabla.do?path=/t25/a072/a01/l0/&file=c30045.px&type=pcaxis&L=0 |
| Diferencia proporcional de la tasa de actividad de las mujeres en relación a la tasa media de ambos sexos | País | 1994-2012a | Encuesta de población activa. INE. Calculado por el Observatorio Social de España. http://barometrosocial.es/genero |
| Políticas macroeconómicas y desigualdad de renta y pobreza | Producto interior bruto (PIB) a precios de mercado per cápita: valor de la producción obtenida por los factores productivos dentro del país. El PIB se divide por la población para obtener el PIB per cápita | País, CCAA | 2008-2012b | Contabilidad regional. INE.  http://www.ine.es/daco/daco42/cre00/b2008/c13d_cre.xls |
| Renta disponible bruta de los hogares per cápita. Se divide por los habitantes para calcularlo por habitante | País, CCAA | 2008-2010b | Contabilidad regional. INE. Cuentas de renta de hogares. Principales resultados.  <http://www.ine.es/jaxi/menu.do?type=pcaxis&path=%2Ft35%2Fp010&file=inebase&L>= |
| Índice de Gini: Indicador de desigualdad de renta que fluctúa entre 0 (no desigualdad) y 1 (máxima desigualdad) | País | 2004-2012 | Encuesta de condiciones de vida. INE.  http://www.ine.es/jaxiBD/tabla.do?per=12&type=db&divi=ECV&idtab=24 |
| Percentil 80/20: establece una relación entre el 20% de la población que más ingresa y el 20% de la que menos ingresa. Los valores más altos indican mayor desigualdad | País | 2004-2012 | Encuesta de condiciones de vida. INE. http://www.ine.es/jaxiBD/tabla.do?per=12&type=db&divi=ECV&idtab=23 |
| Dificultad para llegar a fin de mes: porcentaje de personas con dificultades para llegar a fin de mes | País, CCAA, edad y sexo | 2004-2012 | Encuesta de condiciones de vida. INE. http://www.ine.es/jaxi/tabla.do?path=/t25/p453/provi/l0/&file=01004.px&type=pcaxis&L=0 |
| Porcentaje de población bajo el umbral de pobreza, definida ésta como el 60% de la mediana de los ingresos anuales por unidad de consumo. Los ingresos por unidad de consumo se obtienen dividiendo los ingresos totales del hogar entre el número de unidades de consumo | País, CCAA, edad y sexo | 2004-2012 | Encuesta de condiciones de vida. INE. http://www.ine.es/jaxi/tabla.do?path=/t25/p453/provi/l0/&file=01005.px&type=pcaxis&L=0 |
| Políticas del estado de bienestar:  educación | Gasto en educación (total y público) como porcentaje del PIB | País, UE | 1991-2011 | Eurostat database. ESSPROS.  <http://appsso.eurostat.ec.europa.eu/nui/show.do?dataset=educ_figdp&lang=en> |
| Número de centros públicos de educación infantil | País, CCAA | 2001-2012 | INEbase. Indicadores sociales. INE  <http://www.ine.es/daco/daco42/sociales10/educa-naci.xls>.  Tabla 3 |
| Número de becas y ayudas | País, CCAA | 2001-2011 | INEbase. Indicadores sociales. INE  I<http://www.ine.es/daco/daco42/sociales10/sociales.htm> NO LO HE ENCONTRADO |
| Porcentaje de población ≥16 años sin estudios / ≥16 años | País, CCAA | 1991-2010 | INEbase. Indicadores sociales. INE  <http://www.ine.es/daco/daco42/sociales10/educa-naci.xls>  Tabla 1 |
| Porcentaje de paro en población de 16-29 años según nivel educativo | País, CCAA | 1991-2010 | INEbase. Indicadores sociales. INE  <http://www.ine.es/daco/daco42/sociales10/educa-naci.xls>  Tabla 1 |
| Porcentaje de población sin estudios | País, CCAA | 1991-2010 | INEbase. Indicadores sociales. INE  <http://www.ine.es/daco/daco42/sociales10/educa-naci.xls>  Tabla 1 |
| Políticas del estado de bienestar:  sanidad | Gasto total en salud como porcentaje del PIB | País, CCAA, UE | 1991-2010 | INEbase. Indicadores sociales. INE  http://www.ine.es/daco/daco42/sociales10/salud-naci.xls#'Tabla 9'!A1 |
| Gasto farmacéutico en €, €/persona protegida, gasto/receta | País, CCAA | 1991-2010 | INEbase. Indicadores sociales. INE  http://www.ine.es/daco/daco42/sociales10/salud-naci.xls#'Tabla 9'!A1 |
| Gasto en salud público/privado en euros, euros/habitante, porcentaje del PIB | País, UE | 1991-2010 | INEbase. Indicadores sociales. INE  http://www.ine.es/daco/daco42/sociales10/salud-naci.xls#'Tabla 9'!A1 |
| Personas ≥16 años que valoran positivamente el sistema sanitario público. | País | 1994-2011 | Barómetro de atención sanitaria. CIS. Obtenido del Barómetro Social de España.  <http://barometrosocial.es/salud/> |
| Políticas del estado de bienestar:  vivienda | Porcentaje de viviendas protegidas sujetas a distintos regímenes de protección, promovidas en el ámbito de planes estatales de vivienda, viviendas de promoción pública y otros programas de iniciativa autonómica, de nueva construcción sobre el total de viviendas construidas | País | 1994-2012 | Ministerio de Fomento  Barómetro Social de España  <http://barometrosocial.es/vivienda/> |
| Políticas del estado de bienestar:  dependencia | Distribución (porcentaje) del tipo de prestaciones: servicios de apoyo al cuidado (ayuda a domicilio, teleasistencia, atención residencial, centros día/noche, otros) y prestaciones económicas (cuidados familiares y vinculadas al servicio) | País, CCAA | 2007-2013 | Portal SAAD. IMSERSO.  Los indicadores se obtienen en un documento Excel donde se incluyen todos los indicadores de dependencia  http://www.dependencia.imserso.es/dependencia_01/estadisticas/inf_gp/2013/index.htm |
| Personas beneficiarias con derecho a prestación: número, porcentaje del total de dictámenes, porcentaje del total de población | País, CCAA | 2007-2013 | Portal SAAD. IMSERSO  http://www.dependencia.imserso.es/dependencia_01/estadisticas/inf_gp/2013/index.htm |

PIB: producto interior bruto; CCAA: comunidades autónomas; UE: Unión Europea; **CIS: Centro de Investigaciones Sociológicas;** ESSPROS: **European System of Integrated Social Protection Statistics; EUROSTAT:** Oficina Estadística de las Comunidades Europeas; OCDE: Organización para la Cooperación y el Desarrollo Económico; INE: Instituto Nacional de Estadística; IMSERSO: Instituto de Mayores y Servicios Sociales; SAAD: Sistema de autonomía y atención a la dependencia.

aLos cambios metodológicos de la Encuesta de población activa en 2001 y 2005 influyen en el incremento de la tasa de cobertura al reducir "artificialmente" la cifra de personas paradas.

b Base 2008, con otras bases hay datos anteriores.

| **Tabla 2**  Indicadores propuestos de determinantes sociales y económicos intermedios: definición, características y fuentes de información. | | | | |
| --- | --- | --- | --- | --- |
| **Determinante** | **Indicador y definición** | **Nivel de agregación** | **Serie de datos (años)** | **Fuente de datos** |
| Recursos materiales: condiciones de empleo y de trabajo | Porcentaje de temporalidad de los asalariados utilizando la media de los cuatro trimestres de cada año | País, sexo, edad y tipo de contrato | 2005-2012a | Encuesta de población activa. Datos anuales.  INEbase <http://www.ine.es/jaxiBD/tabla.do?per=12&type=db&divi=EPA&idtab=703> |
| Recursos materiales: trabajo doméstico y cuidados | Porcentaje de menores de 3 años atendidos sólo por su familia (padre y madre), respecto al total de menores de 3 años | País | 2005- 2011 | The European Union Statistics on Income and Living Conditions (EU-SILC), Eurostat  http://appsso.eurostat.ec.europa.eu/nui/show.do?dataset=ilc_caparents&lang=en |
| Recursos materiales: ingresos y situación económica | Porcentaje de personas que han tenido retrasos en el pago de gastos relacionados con la vivienda principal (hipoteca o alquiler, recibos de gas, comunidad...) en los últimos 12 meses | País, CCAA | 2004-2012 | Encuesta de condiciones de vida. INE  http://www.ine.es/jaxi/tabla.do?path=/t25/p453/provi/l0/&file=01003.px&type=pcaxis&L=0 |
| Porcentaje de personas que no tienen capacidad para afrontar gastos imprevistos | País, CCAA | 2004-2012 | Encuesta de condiciones de vida. INE  http://www.ine.es/jaxi/tabla.do?path=/t25/p453/provi/l0/&file=01003.px&type=pcaxis&L=0 |
| Recursos materiales: vivienda y situación material | Número de desahucios de viviendas en alquiler ingresados en los juzgados. | País | 1994-2011 | Consejo del Poder Judicial  Barómetro Social de España  <http://barometrosocial.es/vivienda/> |
| Número de procedimientos ingresados en los Juzgados que permiten exigir el pago de las deudas garantizadas al acreedor con escritura de hipoteca a su favor, debidamente inscrita en el registro de la propiedad. Habitualmente se trata de hipotecas inmobiliarias. | País | 2001-2011 | Consejo del Poder Judicial  Barómetro Social de España  <http://barometrosocial.es/vivienda/> |
| Número de lanzamientos o desalojos forzosos de la vivienda que se efectúan como consecuencia del cumplimiento de una orden judicial de desahucio o embargo y se aplican cuando la parte afectada no abandona la vivienda por propia iniciativa. | País | 2008-2011 | Consejo del Poder Judicial  Barómetro Social de España  <http://barometrosocial.es/vivienda/> |
| Índice de esfuerzo de la compra de vivienda para un hogar medio: Porcentaje de la renta del hogar que suponen las cuotas a pagar en el primer año tras la adquisición de un préstamo hipotecario por el 80 por ciento del valor del piso y una vez descontadas las deducciones fiscales correspondientes a dicha compra (media de los cuatro trimestres de cada año). | País | 1994-2011 | Consejo del Poder Judicial  Barómetro Social de España  <http://barometrosocial.es/vivienda/> |
| Cultura y valores:  cohesión social | Porcentaje de personas que refieren que se puede confiar en el resto de la gente | País | 2009-2012 | Barómetros del CIS  <http://www.cis.es/cis/opencm/ES/11_barometros/index.jsp> |
| Cultura y valores: participación en la comunidad (cultural, deportiva, religiosa o espiritual) | Porcentaje de personas que refieren pertenencia a asociaciones u organizaciones | País | 2009, 2011, 2012 | Barómetros del CIS  <http://www.cis.es/cis/opencm/ES/11_barometros/index.jsp> |
| Servicios de salud | Consulta al médico de familia o pediatra en las últimas 4 semanas | País, CCAA  Sexo, edad, clase social | 1987-2012 | Encuesta Nacional de Salud. Ministerio de sanidad  <http://www.msssi.gob.es/estadEstudios/estadisticas/encuestaNacional/home.htm>  Se puede elegir que ENS consultar |
| Consulta al médico especialista en las últimas 4 semanas | País, CCAA  Sexo, edad, clase social | 1987-2012 | Encuesta Nacional de Salud. Ministerio de sanidad <http://www.msssi.gob.es/estadEstudios/estadisticas/encuestaNacional/home.htm>  Se puede elegir que ENS consultar |
| Lista de espera para ingreso hospitalario en los últimos 12 meses | País, CCAA  Sexo, edad, clase social | 1987-2012 | Encuesta Nacional de Salud. Ministerio de sanidad  <http://www.msssi.gob.es/estadEstudios/estadisticas/encuestaNacional/home.htm>  Se puede elegir que ENS consultar |
| Cobertura sanitaria | País, CCAA, Sexo, edad,  clase social | 1987-2012 | Encuesta Nacional de Salud. Ministerio de sanidad <http://www.msssi.gob.es/estadEstudios/estadisticas/encuestaNacional/home.htm>  Se puede elegir que ENS consultar |
| Factores psicosociales: estrés | Proporción de personas empleadas que refieren como muy o bastante probable que pierdan su empleo actual en los próximos doce meses, respecto al total de empleadas | País | Desde diciembre de 2010 está con periodicidad casi mensual. | Barómetros del CIS  <http://www.cis.es/cis/opencm/ES/11_barometros/index.jsp> |
| Proporción de personas desempleadas que refieren como poco o nada probable que encuentren trabajo en los próximos doce meses, respecto al total de desempleadas | País | Desde diciembre de 2010 está con periodicidad casi mensual. | Barómetros del CIS  <http://www.cis.es/cis/opencm/ES/11_barometros/index.jsp> |

CCAA: comunidades autonómas; CIS: Centro de Investigaciones Sociológicas; EUROSTAT: Oficina Estadística de las Comunidades Europeas; INE: Instituto Nacional de Estadística.

a Los cambios metodológicos introducidos en la Encuesta de población activa en 2001 y 2005 apenas influyen en este indicador.

**Tabla 4**

Indicadores de salud: definición, características y fuentes de información.

| **Indicador y definición** | **Nivel de agregación** | **Serie de datos (años)** | **Fuente de datos** |
| --- | --- | --- | --- |
| Mala salud mental: se obtiene la media y la desviación típica de la puntuación entre 0 y 12. Se considera mala salud cuando la puntuación es de 3 o más. Debe calcularse la prevalencia | País y CCAA  Sexo, edad, clase social y país de nacimiento | 2006, 2012 | Encuesta Nacional de Salud. Ministerio de Sanidad https://www.msssi.gob.es/estadEstudios/estadisticas/encuestaNacional/home.htm |
| Tasa de mortalidad (por 100.000 habitantes) por suicidio (código 098 de la lista reducida del INE) | País y CCAA  Sexo, edad | Anual hasta 2012 | Registro de mortalidad del INE http://www.ine.es/jaxi/menu.do?type=pcaxis&path=/t15/p417/a2011/&file=pcaxis |
| Tasa de mortalidad por causas relacionadas con el alcohol. Seleccionar como causa de muerte la cirrosis y otras enfermedades del hígado (código 071 de la lista reducida del INE) | País y CCAA  Sexo, edad | Anual hasta 2012 | Registro de mortalidad del INE <http://www.ine.es/jaxi/menu.do?type=pcaxis&path=/t15/p417/a2011/&file=pcaxis> |
| Frecuencia (por 100) de consumo de alcohol en los últimos 30 días | País y CCAA  Sexo, edad | 1995-2011 | Encuesta Domiciliaria sobre Alcohol y Drogas en España (EDADES). Datos del Observatorio Nacional de Drogas. Ministerio de Sanidad. Accesibles en: INE  http://www.ine.es/jaxi/menu.do?type=pcaxis&path=/t15/a044/a101/&file=pcaxis |
| Tasa de mortalidad (por 100.000 habitantes) por sobredosis (código 095 de la lista reducida del INE) | País y CCAA  Sexo, edad | Anual hasta 2011 | Registro de mortalidad del INE <http://www.ine.es/jaxi/menu.do?type=pcaxis&path=%2Ft15/p417&file=inebase&L=0> |
| Frecuencia (por 100) de consumo de drogas en los últimos 30 días | País y CCAA  Sexo, edad | 1995-2011 | Encuesta Domiciliaria sobre Alcohol y Drogas en España (EDADES). Datos del Observatorio Nacional de Drogas. Ministerio de Sanidad. Accesibles en: INE  http://www.ine.es/jaxi/menu.do?type=pcaxis&path=/t15/a044/a101/&file=pcaxis |
| | Frecuencia (por 100) de consumo actual de tabaco (en la ENS del 2012 se especifica respecto a hace especifica en los 2 años anteriores y en de los fumadores  diarios) |  | | --- | --- | | País y CCAA  Sexo, edad, clase social y país de nacimiento | 1987-2012 | Encuesta Nacional de Salud. Ministerio de Sanidad https://www.msssi.gob.es/estadEstudios/estadisticas/encuestaNacional/home.htm |
| Tasa de mortalidad (por 100.000 habitantes) por causas relacionadas con el consumo de tabaco: tumor maligno de tráquea, bronquios y pulmón (código 018 de la lista reducida del INE) | País y CCAA  Sexo, edad | Anual hasta 2012 | Registro de mortalidad del INE <http://www.ine.es/jaxi/menu.do?type=pcaxis&path=%2Ft15/p417&file=inebase&L=0> |
| Tasa de mortalidad por enfermedades cardiovasculares (código 053-061de la lista reducida del INE) | País, sexo y edad | Mensual | http://www.ine.es/jaxi/tabla.do?path=/t38/p604/a2000/l0/&file=0300002.px&type=pcaxis |
| Tasa de mortalidad (por 100.000 habitantes) por accidentes de tráfico de vehículos de motor (código 090 de la lista reducida de causas de muerte del INE) | País y CCAA  Sexo, edad | Anual hasta 2012 | Registro de mortalidad del INE <http://www.ine.es/jaxi/menu.do?type=pcaxis&path=%2Ft15/p417&file=inebase&L=0> |
| Frecuencia (100) de malnutrición en la vejez y la infancia | País y CCAA  Sexo, edad, clase social y país de nacimiento | 1987-2012 | Encuesta Nacional de Salud. Ministerio de Sanidad https://www.msssi.gob.es/estadEstudios/estadisticas/encuestaNacional/home.htm |
| Número de brotes de enfermedades inmunoprevenibles | País y CCAA | Anual hasta 2011 | Boletín epidemiológico, volumen anual. Centro Nacional de Epidemiología <http://revista.isciii.es/index.php/bes/issue/archive/2012> |
| Tasa de incidencia (por 100.000 habitantes) de tuberculosis | Sexo, edad | Anual hasta 2011 | Boletín epidemiológico, volumen anual. Centro Nacional de Epidemiología <http://revista.isciii.es/index.php/bes/issue/archive/2012> |
| Tasa de incidencia (por 100.000 habitantes) de VIH-sida | País y CCAA | Anual hasta 2011 | Boletín epidemiológico, volumen anual. Centro Nacional de Epidemiología <http://revista.isciii.es/index.php/bes/issue/archive/2012> |
| Tasa de incidencia (por 100.000 habitantes) de ITS (VIH-sida, sífilis y gonococia) | País y CCAA | Anual hasta 2011 | Boletín epidemiológico, volumen anual. Centro Nacional de Epidemiología <http://revista.isciii.es/index.php/bes/issue/archive/2012> |
| Tasa de incidencia (por 100.000 habitantes) de enfermedades inmunoprevenibles | Sexo, edad | Anual hasta 2011 | Boletín epidemiológico, volumen anual. Centro Nacional de Epidemiología <http://revista.isciii.es/index.php/bes/issue/archive/2012> |
| Mortalidad (por 1000 habitantes) fetal | País y CCAA  Sexo y semanas de gestación | Anual hasta 2012 | INE  http://www.ine.es/jaxi/tabla.do?path=/t15/p417/a2011/l0/&file=01007.px&type=pcaxis&L=0 |
| | Tasa de fecundidad (por 1000 mujeres) | | --- | |  | | País y CCAA  Sexo, edad y país de nacimiento de la madre | Anual hasta 2012 | Registro de nacimientos del INE http://www.ine.es/jaxiBD/menu.do?L=0&divi=IDB&his=0&type=db |

CCAA: comunidades autónomas; INE: Instituto Nacional de Estadística.
